# Supplementary material for: Turn-on detection of Al3+ ions using quinoline-based tripodal probe: mechanistic investigation and live cell imaging applications
Source: Royal Society of Chemistry journal article supplement (doi:10.1039/d4ay00761a), 2024-01-01
Supplement: d4ay00761a1.pdf [file d4ay00761a1.pdf]

Supporting information

for

**Turn-on detection of Al<sup>3+</sup> ion by quinoline based tripodal probe: Mechanistic investigation and live cells imaging applications**

Nidhi Goswami<sup>a</sup>, Sudhanshu Naithani<sup>a</sup>, Tapas Goswami<sup>a</sup>, Pankaj Kumar<sup>a\*</sup>,  
Pramod Kumar<sup>b\*</sup>, Sushil Kumar<sup>a\*</sup>

<sup>a</sup> *Department of Chemistry, Applied Science Cluster, University of Petroleum and Energy Studies (UPES), Dehradun-248007, Uttarakhand, India. Email: [sushil.k@ddn.upes.ac.in](mailto:sushil.k@ddn.upes.ac.in)*

<sup>b</sup> *Department of Chemistry, Mahamana Malviya College Khekra (Baghpat), C.C.S. University Meerut, India. Email: [baliyanpk@gmail.com](mailto:baliyanpk@gmail.com)*

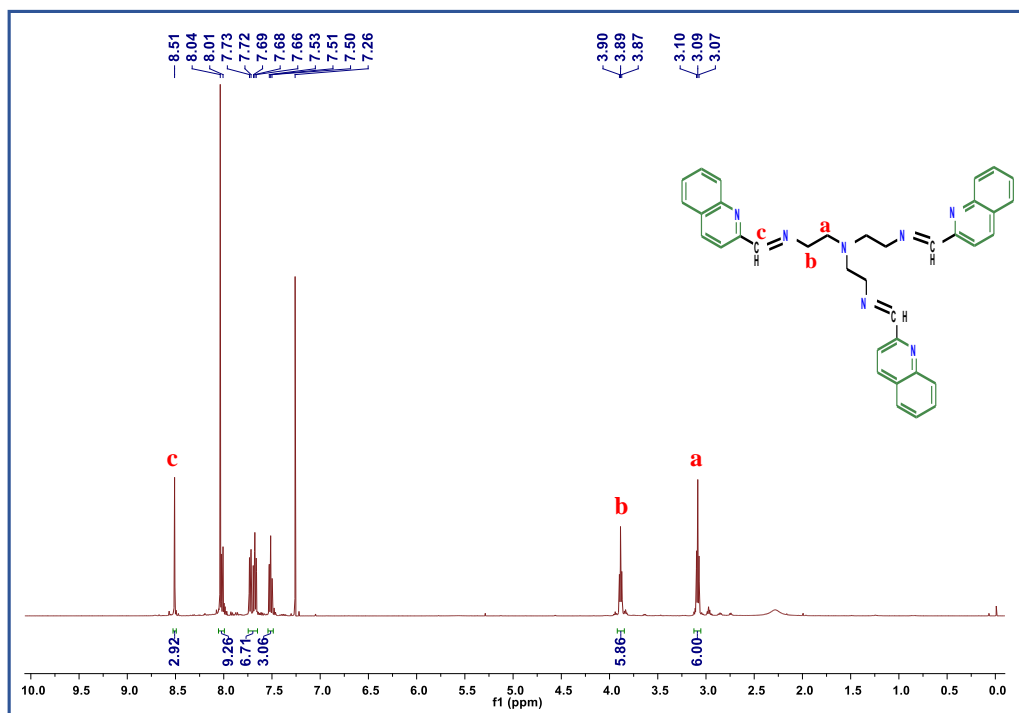

**Fig. S1.**  $^1\text{H}$  NMR spectrum of **TQSB** in  $\text{CDCl}_3$  at room temperature.

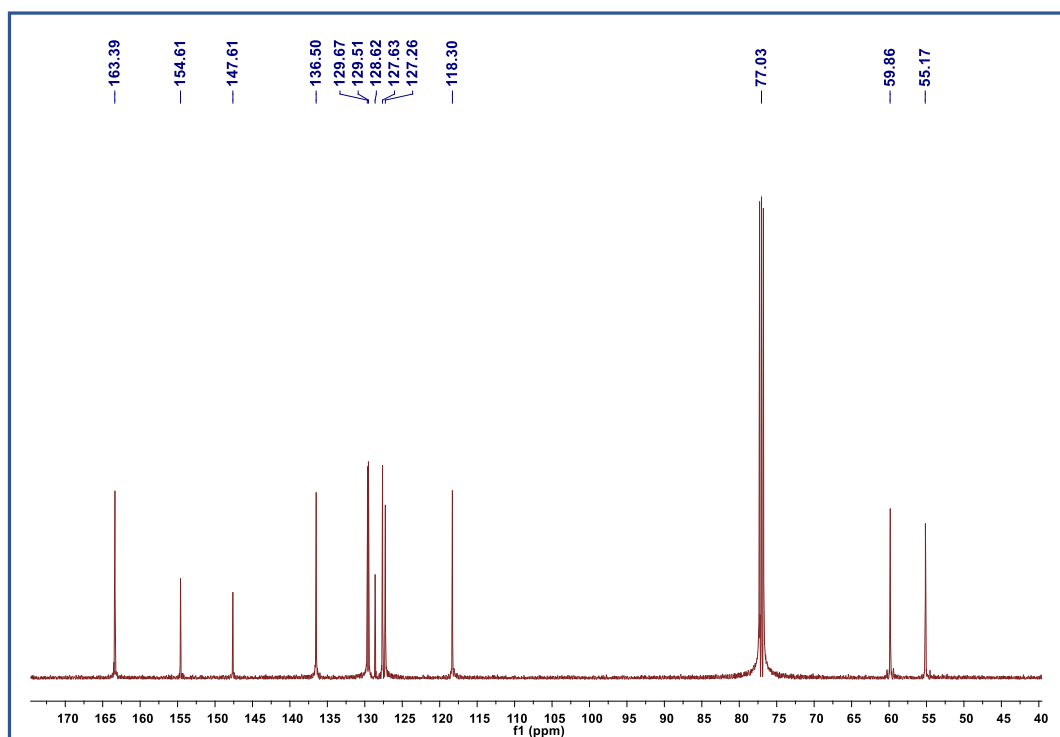

**Fig. S2.**  $^{13}\text{C}$  NMR spectrum of **TQSB** in  $\text{CDCl}_3$  at room temperature.

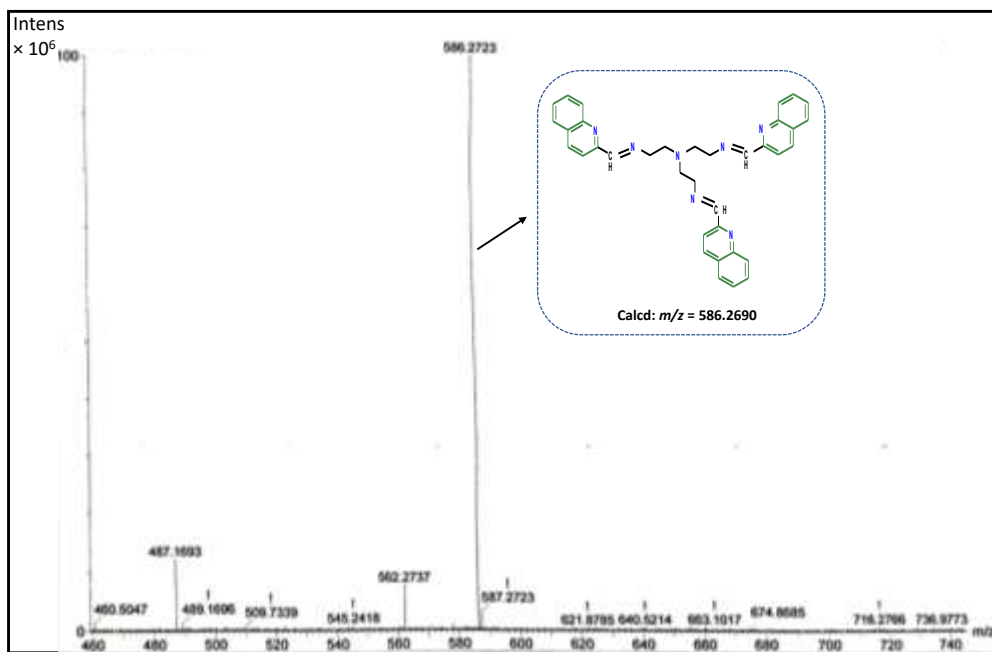

**Fig. S3.** ESI-MS analysis of **TQSB** in methanol at room temperature.

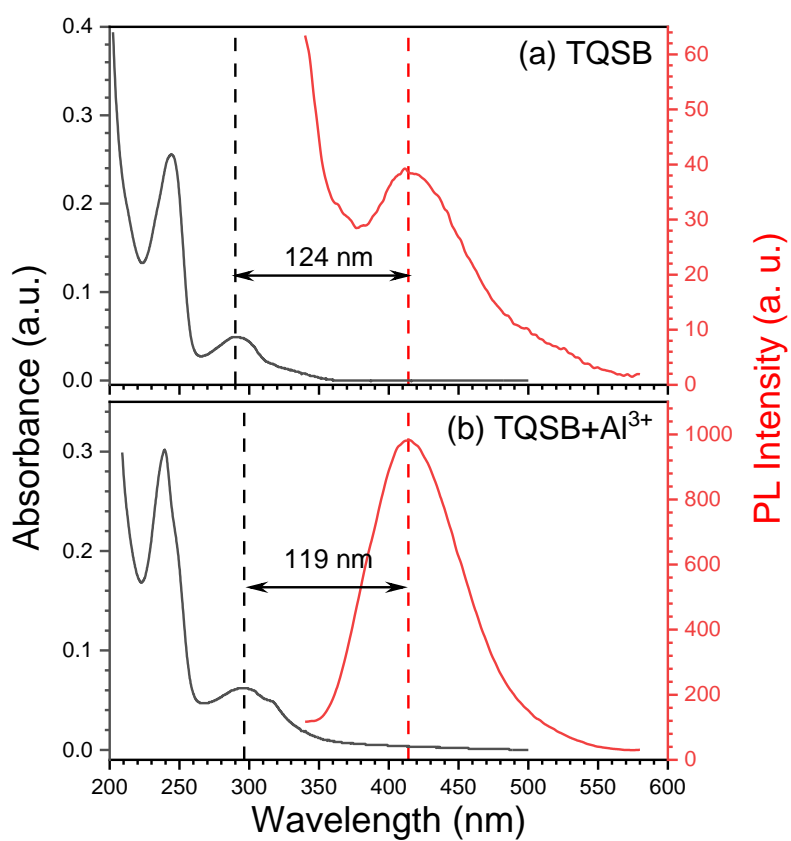

**Fig. S4.** UV-Vis and emission spectra for (a) **TQSB** and (b) **TQSB-Al<sup>3+</sup>** in acetonitrile solutions along with their Stokes shift values.

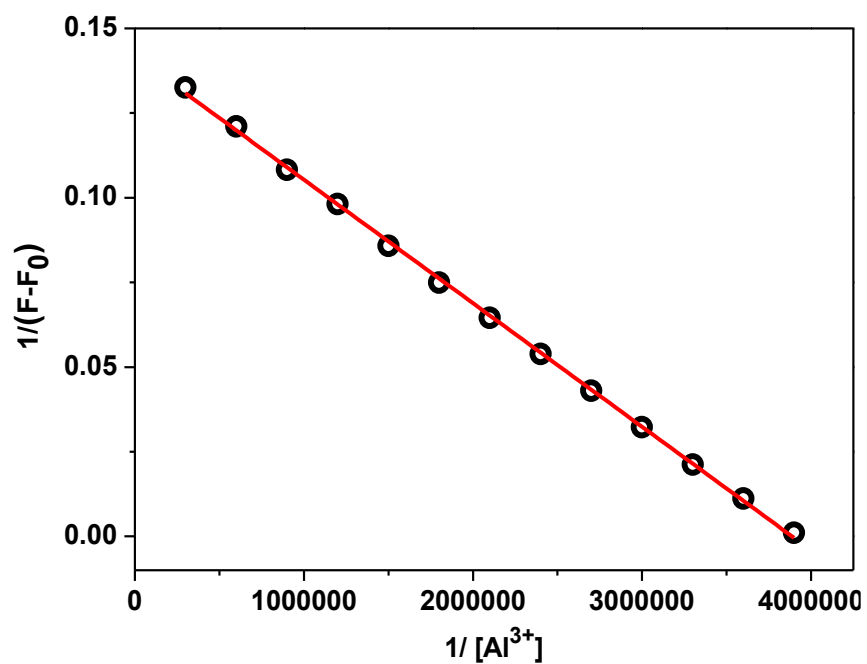

Fig. S5. Benesi-Hildebrand plot for determination of binding constant.

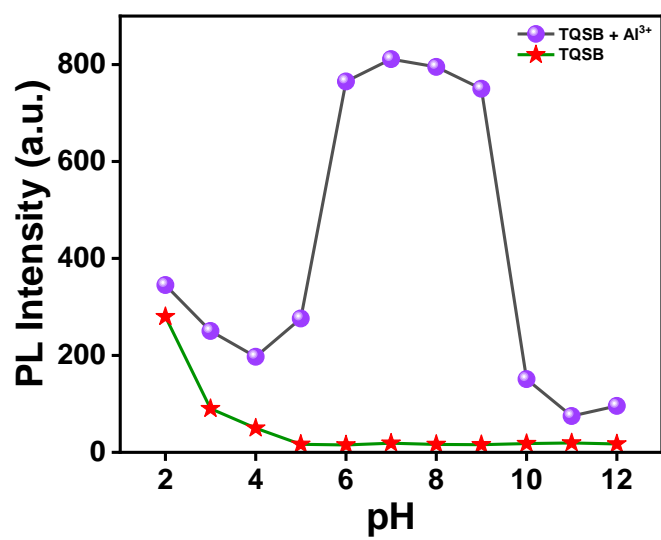

Fig. S6. Effect of pH on probe TQSB and TQSB- $Al^{3+}$  complex.

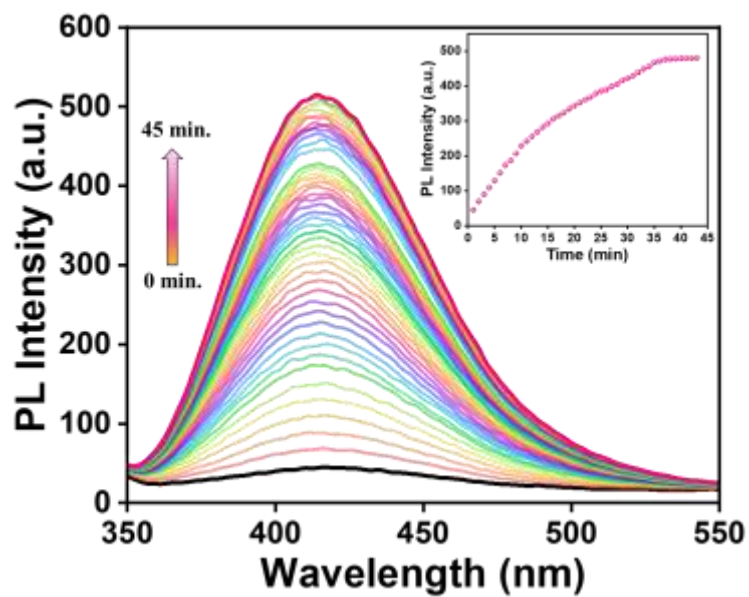

Fig. S7. Response time of probe TQSB with  $\text{Al}^{3+}$  ions.

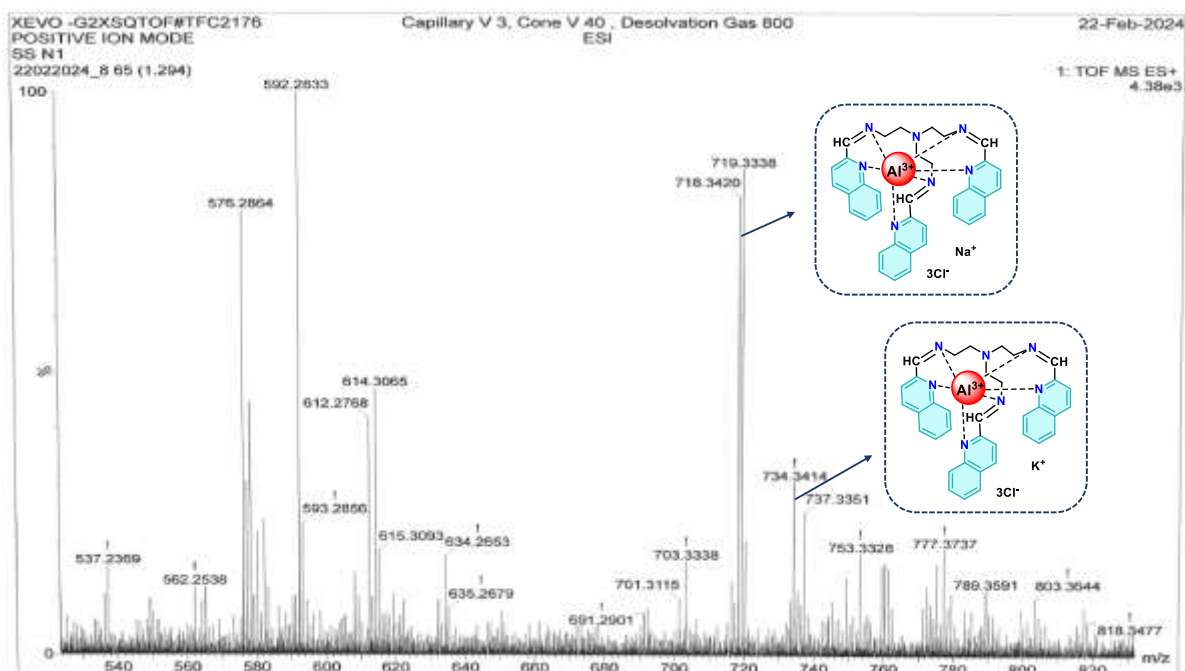

Fig. S8. ESI-MS analysis of TQSB- $\text{Al}^{3+}$  in methanol at room temperature.

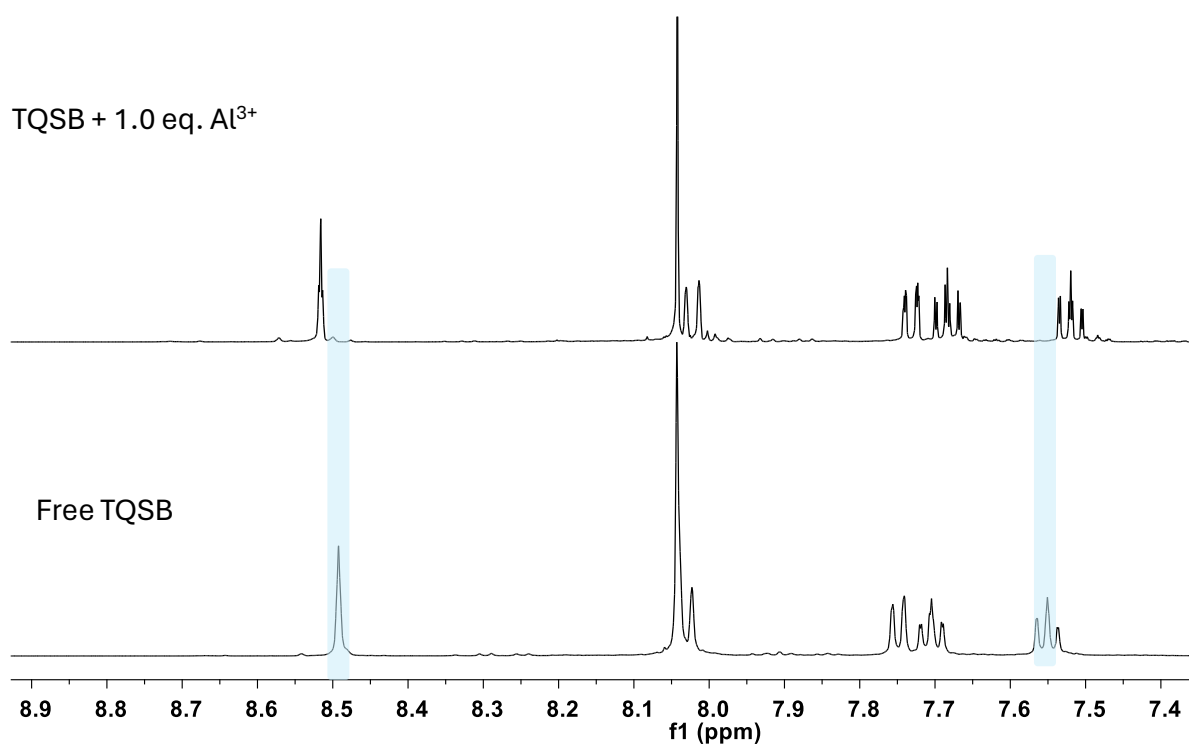

**Fig. S9.**  $^1\text{H}$  NMR analysis of probe **TQSB** in absence and presence of  $\text{Al}^{3+}$  at room temperature.

**Table S1.** Optimized bond distances obtained from DFT calculations.

|        | Bond length (Å) |
|--------|-----------------|
| Al-N11 | 2.15927         |
| Al-N12 | 2.04614         |
| Al-N21 | 2.15956         |
| Al-N22 | 2.04639         |
| Al-N31 | 2.15962         |
| Al-N32 | 2.04638         |

**Table S2.** Fluorescence quantum yield values and HOMO/LUMO energies of **TQSB** and **TQSB- $\text{Al}^{3+}$** .

|                          | TQSB          | TQSB- $\text{Al}^{3+}$ |
|--------------------------|---------------|------------------------|
| Quantum yield            | 0.058         | 0.464                  |
| HOMO ( $E_1$ )           | (-) 5.4017 eV | (-) 13.7156 eV         |
| LUMO ( $E_2$ )           | (-) 1.9662 eV | (-) 11.3969 eV         |
| $\Delta E$ ( $E_1-E_2$ ) | 3.4355 eV     | 2.3187 eV              |

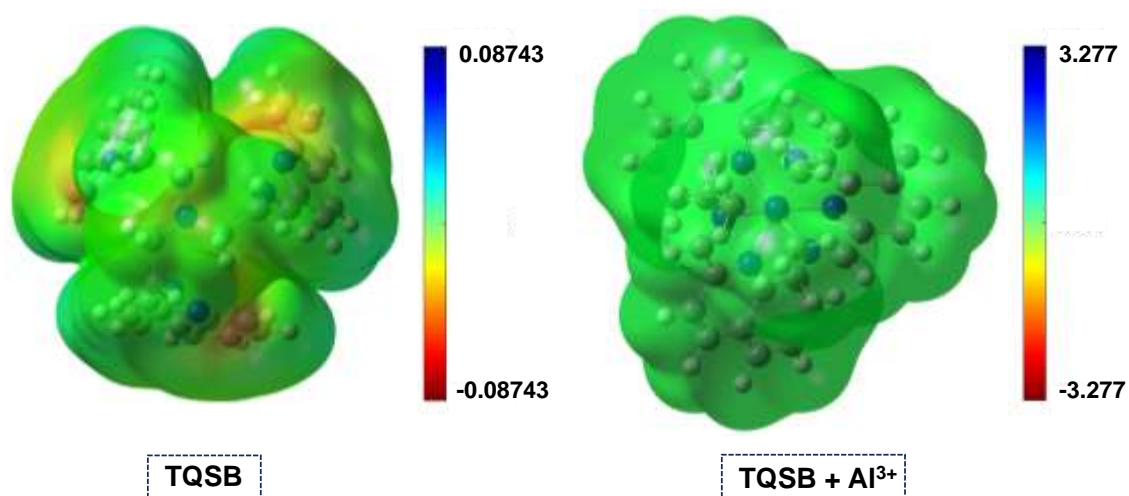

**Fig. S10.** The electrostatic potential (ESP) of **TQSB** (-0.08743 to + 0.08743) and **TQSB-Al<sup>3+</sup>** (-3.277 to + 3.277).

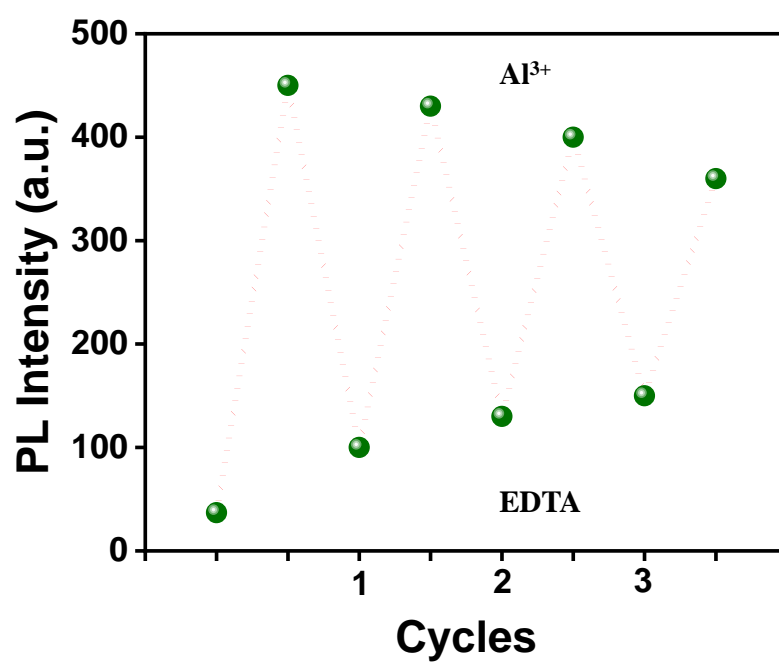

**Fig. S11.** Fluorescence intensity of **TQSB** at 414 nm upon alternate addition of a varied amount of **Al<sup>3+</sup>** and **EDTA** ions.

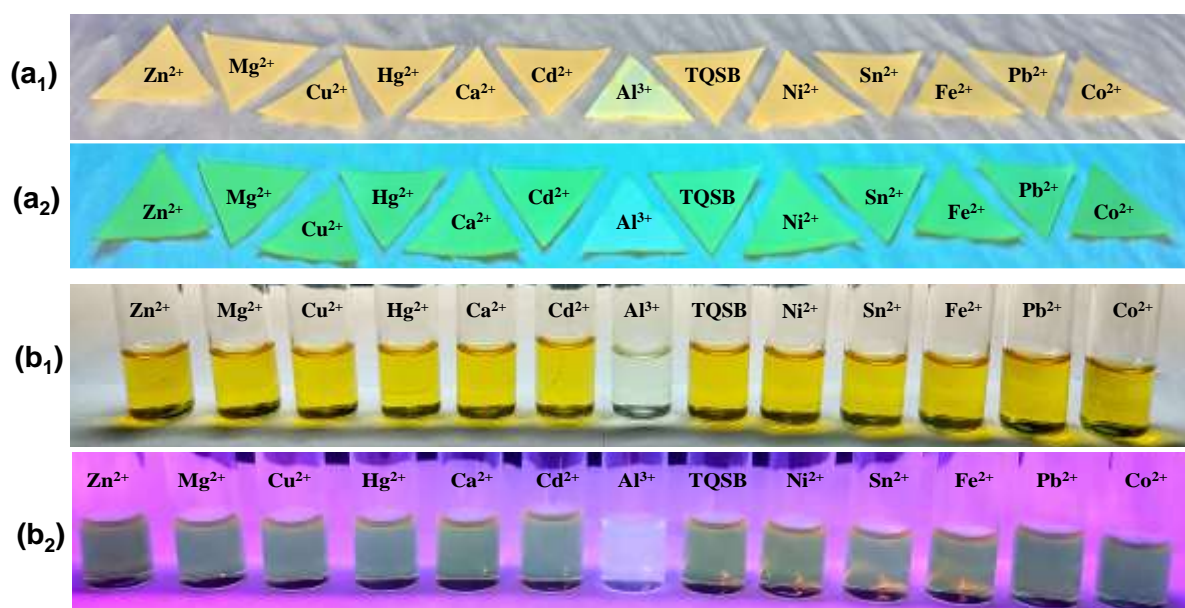

**Fig. S12.** Fluorogenic and chromogenic changes in **TQSB** upon addition of various metal ions ( $\lambda_{\text{ex}}=310\text{ nm}$ ) (a<sub>1</sub>-a<sub>2</sub>) on paper strips and (b<sub>1</sub>-b<sub>2</sub>) in CH<sub>3</sub>CN-H<sub>2</sub>O solution under visible and UV light, respectively.

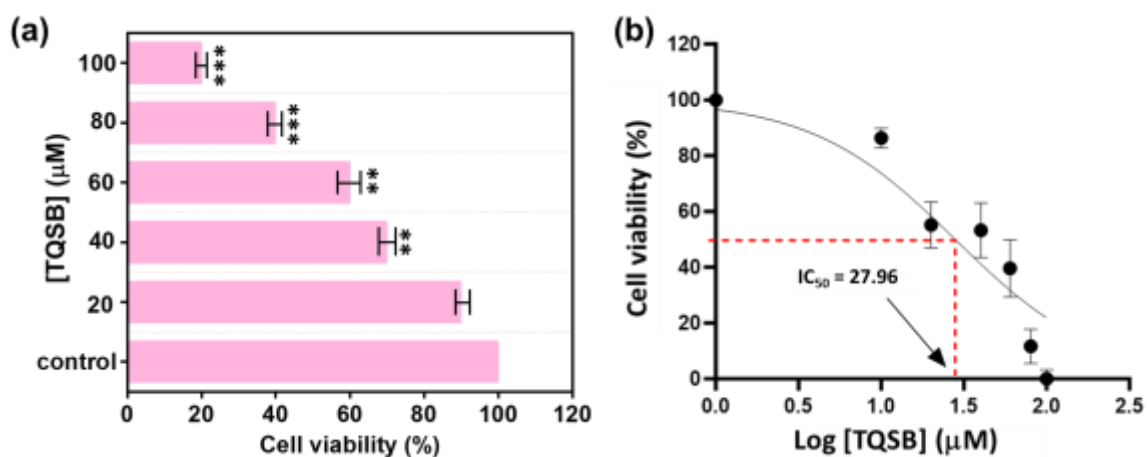

**Fig. S13.** (a) MTT assay of **TQSB** on MCF-7 cells lines and (b) IC<sub>50</sub> dose of probe **TQSB** in MCF-7 cells was depicted as 27.96 μM.



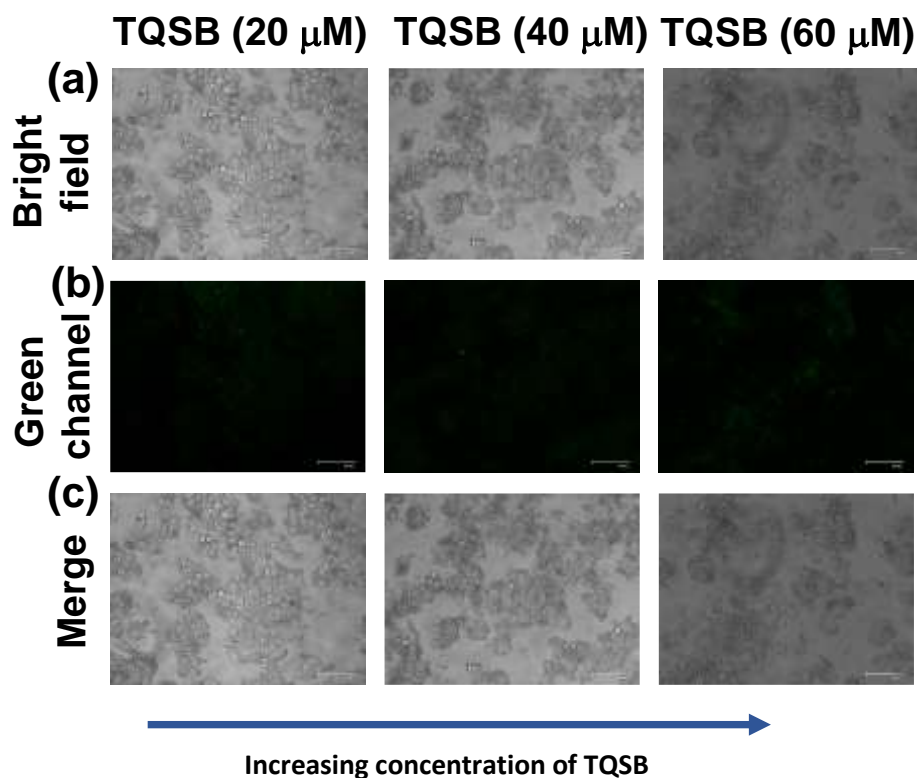

**Fig. S14.** Confocal imaging of human breast cancer MCF-7 cell lines incubated with variable concentrations (20-60  $\mu\text{M}$ ) of **TQSB**.

**Table. S3.** Comparison of sensing parameters of probe **TQSB** with some previously reported probes.

| S.N. | Probe                                                                               | Target ions                            | LoD ( $\mu\text{M}$ ) | Application                                                   | Ref. |
|------|-------------------------------------------------------------------------------------|----------------------------------------|-----------------------|---------------------------------------------------------------|------|
| 1.   | 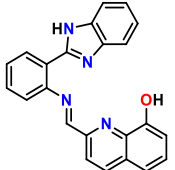 | $\text{Al}^{3+}$                       | 0.9                   | Bore water, drinking water, tap water, BSA, Live cell imaging | [1]  |
| 2.   |  | $\text{Al}^{3+}$ ,<br>$\text{Fe}^{3+}$ | 0.0122<br>0.104       | Tap water, bottled water                                      | [2]  |
| 3.   |  | $\text{Al}^{3+}$ ,<br>$\text{ClO}^-$   | 0.0298<br>0.025       | Real water samples and Live cell imaging                      | [3]  |
| 4.   |  | $\text{Al}^{3+}$ ,<br>$\text{Zn}^{2+}$ | 0.097<br>0.21         | Real water samples                                            | [4]  |

|     |                                                                                     |                                                  |                         |                                                         |                  |
|-----|-------------------------------------------------------------------------------------|--------------------------------------------------|-------------------------|---------------------------------------------------------|------------------|
| 5.  | 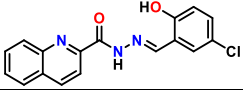   | Al <sup>3+</sup>                                 | 1.25                    | Bioimaging in living cells, plants and zebrafish        | [5]              |
| 6.  |    | Al <sup>3+</sup> , HSO <sub>3</sub> <sup>-</sup> | 0.0021<br>0.0023        | Drinking water and food samples                         | [6]              |
| 7.  |    | Al <sup>3+</sup>                                 | 0.0158                  | Test paper strips                                       | [7]              |
| 8.  |    | Al <sup>3+</sup>                                 | 0.0235                  | Cell imaging                                            | [8]              |
| 9.  |    | Al <sup>3+</sup>                                 | 3.67 × 10 <sup>-2</sup> | Cell imaging                                            | [9]              |
| 10. |   | Al <sup>3+</sup>                                 | 0.01                    | -                                                       | [10]             |
| 11. |  | Al <sup>3+</sup>                                 | 2.14 × 10 <sup>-2</sup> | Real water samples                                      | [11]             |
| 12. |  | Al <sup>3+</sup>                                 | 0.007                   | Live cell imaging, test paper strips, and digene tablet | <b>This work</b> |

**Table. S4.** Detection of Al<sup>3+</sup> in real samples.

| Sample                | Al <sup>3+</sup> spiked / Present (μM) | Al <sup>3+</sup> calculated (μM) | % Recovery |
|-----------------------|----------------------------------------|----------------------------------|------------|
| <b>Soil samples</b>   |                                        |                                  |            |
|                       | 0.4                                    | 0.38                             | 95.0       |
|                       | 0.8                                    | 0.77                             | 96.25      |
|                       | 1.0                                    | 1.04                             | 104        |
| <b>Gastric Tablet</b> |                                        |                                  |            |
|                       | 0.4                                    | 0.39                             | 97.5       |
|                       | 0.8                                    | 0.82                             | 102.5      |
|                       | 1.0                                    | 0.97                             | 97         |

## References

1. A. Kalavathi, P. Saravanakumar, K. Satheeshkumar, K. N. Vennila, and K. P. Elango, *J. Mol. Struct.*, 2023, **1289**, 135895.
2. Y. Ding, C. Zhao, P. Zhang, Y. Chen, W. Song, G. Liu, Z. Liu, L. Yun and R. Han, *J. Mol. Struct.*, 2021, **1231**, 129965.
3. C.-L. Zhang, C. Liu, S.-r. Nie, X.-L. Li, Y.-m. Wang, Y. Zhang, J.-h. Guo, and Y.d. Sun, *Spectrochim. Acta A Mol. Biomol. Spectrosc.*, 2023, **300**, 122917.
4. L.-L. Man, T.-L. Wang, K. Liu, X. Hou, Z.-X. Wang, L. Tong, and W.-K. Dong, *J. Mol. Struct.*, 2024, **1303**, 137586.
5. W. Lu, J. Chen, J. Shi, L. Xu, S. Yang, and B. Gao, *J. Biol. Inorg. Chem.*, 2021, **26**, 57-66.
6. C. I. David, H. Jayaraj, G. Prabakaran, K. Velmurugan, D. P. Devi, R. Kayalvizhi, A. Abiram, V. R. Kannan, and R. Nandhakumar, *Food Chemistry*, 2022, **371**, 131130.
7. N. Goswami, S. Naithani, T. Goswami, P. Kumar, P. Kumar, and S. Kumar, *Spectrochim. Acta A Mol. Biomol. Spectrosc.*, 2024, **310**, 123971.
8. P. Ghorai, K. Pal, P. Karmakar, and A. Saha, *Dalton Trans.*, 2020, **49(15)**, 4758-4773.
9. S. Zeng, S. J. Li, X. J. Sun, M. Q. Li, Y. Q. Ma, Z. Y. Xing, and J. L. Li, *Spectrochim. Acta A Mol. Biomol. Spectrosc.*, 2018, **205**, 276-286.
10. G. Bartwal, K. Aggarwal, J. M. Khurana, *J. Photochem. Photobiol. A*, 2020, **394**, 112492.
11. H. Peng, X. Peng, J. Huang, A. Huang, S. Xu, J. Zhou, and X. Cai, *J. Molecular Struct.*, 2020, **1212**, 128138.
